# Supplementary material for: Health-related quality of life among older adults following acute hospitalization: longitudinal analysis of a randomized controlled trial
Source: PubMed Central journal article supplement (PMC11286627; doi:10.1007/s11136-024-03689-x), 2024-06-17
Supplement: 11136_2024_3689_MOESM1_ESM.pdf [file 11136_2024_3689_MOESM1_ESM.pdf]

## Health-related quality of life among older adults following acute hospitalization

### Journal

Quality of Life Research

### Authors

Eirin Guldsten Robinson<sup>1</sup>, Hanna Gyllensten<sup>2</sup>, Anne Gerd Granas<sup>1</sup>, Kjell H Halvorsen<sup>3</sup>, Beate Hennie Garcia<sup>3,4</sup>

### Affiliations

<sup>1</sup> Department of Pharmacy, University of Oslo, 0316 Oslo, Norway.

<sup>2</sup> Institute of Health and Care Sciences, Sahlgrenska Academy, University of Gothenburg, Gothenburg, Sweden

<sup>3</sup> Department of Pharmacy, Faculty of Health Sciences, UiT the Arctic University of Norway, Tromsø, Norway.

<sup>4</sup> Hospital Pharmacy of North Norway Trust, Tromsø, Norway

**Correspondence to:** e.g.robinson@farmasi.uio.no

|                                                                                                                                                                                        |           |
|----------------------------------------------------------------------------------------------------------------------------------------------------------------------------------------|-----------|
| <b>Table S1 Problems in the EQ-5D dimensions, index scores and EQ-VAS in the non-long stayers (n=222)</b>                                                                              | <b>2</b>  |
| <b>Table S2 Problems in the EQ-5D dimensions, index scores and EQ-VAS in the long stayers (n=63)</b>                                                                                   | <b>3</b>  |
| <b>Table S3 Results of multivariable multi-level logistic regression models of EQ-5D dimensions (no problem versus problem (moderate or extreme)) for the non-long stayers (n=222)</b> | <b>4</b>  |
| <b>Table S4 Results of multivariable multi-level logistic regression models of EQ-5D dimensions (no problem versus problem (moderate or extreme)) for the long stayers (n=63)</b>      | <b>5</b>  |
| <b>Table S5 Results of univariable multi-level logistic regression models of EQ-5D dimensions (no problem versus problem (moderate or extreme)) for the full population (n=285)</b>    | <b>6</b>  |
| <b>Table S6 Results of univariable multi-level logistic regression models of EQ-5D dimensions (no problem versus problem (moderate or extreme)) for the non-long stayers (n=222)</b>   | <b>7</b>  |
| <b>Table S7 Results of univariable multi-level logistic regression models of EQ-5D dimensions (no problem versus problem (moderate or extreme)) for the long stayers (n=63)</b>        | <b>8</b>  |
| <b>Table S8 Results of univariable and final multivariable mixed model regressions of index scores for the non-long stayers (n=222) and long stayers (n=63)</b>                        | <b>9</b>  |
| <b>Table S9 Results of univariable and final multivariable mixed model regressions of EQ-5D VAS for the non-long stayers (n=222) and long stayers (n=63)</b>                           | <b>10</b> |

**Table S1** Problems in the EQ-5D dimensions, index scores and EQ-VAS in the non-long stayers (n=222)

|                                         | Discharge N=222             |                        | 1 month N=217               |                        | 6 months N=211              |                        | 12 months N=205            |                        |
|-----------------------------------------|-----------------------------|------------------------|-----------------------------|------------------------|-----------------------------|------------------------|----------------------------|------------------------|
|                                         | Intervention group<br>n=104 | Control group<br>n=116 | Intervention group<br>n=105 | Control group<br>n=112 | Intervention group<br>n=101 | Control group<br>n=110 | Intervention group<br>n=99 | Control group<br>n=106 |
| <b>Mobility, n (%)</b>                  |                             |                        |                             |                        |                             |                        |                            |                        |
| No problems                             | 29 (27.4)                   | 31 (26.7)              | 34 (32.4)                   | 28 (25.0)              | 32 (31.7)                   | 21 (19.1)              | 26 (26.3)                  | 16 (15.1)              |
| Moderate problems                       | 68 (64.2)                   | 75 (64.7)              | 62 (59.1)                   | 70 (62.5)              | 60 (59.4)                   | 70 (63.6)              | 58 (58.6)                  | 67 (63.2)              |
| Extreme problems                        | 7 (6.6)                     | 10 (8.6)               | 6 (5.7)                     | 6 (5.4)                | 3 (3.0)                     | 8 (7.3)                | 6 (6.1)                    | 8 (7.6)                |
| Reporting any problems <sup>a</sup>     | 75 (70.8)                   | 85 (73.3)              | 68 (64.8)                   | 76 (67.9)              | 63 (62.4)                   | 78 (70.9)              | 64 (64.7)                  | 75 (70.8)              |
| Missing                                 | 2 (1.9)                     | 0 (0.0)                | 3 (2.9)                     | 8 (7.1)                | 6 (5.9)                     | 11 (10.0)              | 9 (9.1)                    | 15 (14.2)              |
| <b>Self-care, n (%)</b>                 |                             |                        |                             |                        |                             |                        |                            |                        |
| No problems                             | 69 (65.1)                   | 74 (63.8)              | 70 (66.7)                   | 74 (66.1)              | 78 (77.2)                   | 75 (68.2)              | 64 (64.7)                  | 69 (65.1)              |
| Moderate problems                       | 28 (26.4)                   | 30 (25.9)              | 28 (26.7)                   | 24 (21.4)              | 15 (14.9)                   | 17 (15.5)              | 24 (24.2)                  | 14 (13.2)              |
| Extreme problems                        | 7 (6.6)                     | 12 (10.3)              | 4 (3.8)                     | 6 (5.4)                | 2 (2.0)                     | 6 (5.5)                | 2 (2.0)                    | 8 (7.6)                |
| Reporting any problems <sup>a</sup>     | 35 (33.0)                   | 42 (36.2)              | 32 (30.5)                   | 30 (26.8)              | 17 (16.8)                   | 23 (20.9)              | 26 (26.3)                  | 22 (20.8)              |
| Missing                                 | 2 (1.9)                     | 0 (0.0)                | 3 (2.9)                     | 8 (7.1)                | 6 (5.9)                     | 12 (10.9)              | 9 (9.1)                    | 15 (14.2)              |
| <b>Usual activities, n (%)</b>          |                             |                        |                             |                        |                             |                        |                            |                        |
| No problems                             | 32 (30.2)                   | 35 (30.2)              | 42 (40.0)                   | 29 (25.9)              | 34 (33.7)                   | 29 (36.4)              | 34 (34.3)                  | 28 (26.4)              |
| Moderate problems                       | 44 (41.5)                   | 46 (39.7)              | 43 (41.0)                   | 53 (47.3)              | 46 (45.5)                   | 47 (42.7)              | 40 (40.4)                  | 41 (38.7)              |
| Extreme problems                        | 28 (26.4)                   | 35 (30.2)              | 17 (16.2)                   | 22 (19.6)              | 15 (14.9)                   | 21 (19.1)              | 16 (16.2)                  | 22 (20.8)              |
| Reporting any problems <sup>a</sup>     | 72 (67.9)                   | 81 (69.8)              | 60 (57.1)                   | 75 (67.0)              | 61 (60.4)                   | 68 (61.8)              | 56 (56.6)                  | 63 (59.4)              |
| Missing                                 | 2 (1.9)                     | 0 (0.0)                | 3 (2.9)                     | 8 (7.1)                | 6 (5.9)                     | 13 (11.8)              | 9 (9.1)                    | 15 (14.2)              |
| <b>Pain/discomfort, n (%)</b>           |                             |                        |                             |                        |                             |                        |                            |                        |
| No problems                             | 33 (31.1)                   | 42 (36.2)              | 34 (32.4)                   | 44 (39.3)              | 36 (35.6)                   | 30 (27.3)              | 26 (26.3)                  | 27 (25.5)              |
| Moderate problems                       | 58 (54.7)                   | 57 (49.1)              | 57 (54.3)                   | 49 (43.8)              | 48 (47.5)                   | 50 (45.5)              | 53 (53.5)                  | 49 (46.2)              |
| Extreme problems                        | 13 (12.3)                   | 17 (14.7)              | 11 (10.5)                   | 11 (9.8)               | 11 (10.9)                   | 18 (16.4)              | 11 (11.1)                  | 15 (14.2)              |
| Reporting any problems <sup>a</sup>     | 71 (67.0)                   | 74 (63.8)              | 68 (64.8)                   | 60 (53.6)              | 59 (58.4)                   | 68 (61.8)              | 64 (64.6)                  | 64 (60.4)              |
| Missing                                 | 2 (1.9)                     | 0 (0.0)                | 3 (2.9)                     | 8 (7.1)                | 6 (5.9)                     | 12 (10.9)              | 9 (9.1)                    | 15 (14.2)              |
| <b>Anxiety/depression, n (%)</b>        |                             |                        |                             |                        |                             |                        |                            |                        |
| No problems                             | 63 (59.4)                   | 68 (58.6)              | 63 (60.0)                   | 67 (59.8)              | 59 (58.4)                   | 56 (51.0)              | 55 (55.6)                  | 57 (53.8)              |
| Moderate problems                       | 35 (33.0)                   | 39 (33.6)              | 36 (34.3)                   | 32 (28.6)              | 35 (34.7)                   | 37 (33.6)              | 34 (34.3)                  | 29 (27.4)              |
| Extreme problems                        | 6 (5.7)                     | 9 (7.8)                | 3 (2.9)                     | 4 (3.6)                | 1 (1.0)                     | 5 (4.6)                | 1 (1.0)                    | 4 (3.8)                |
| Reporting any problems <sup>a</sup>     | 41 (38.7)                   | 48 (41.4)              | 39 (37.1)                   | 36 (32.1)              | 36 (35.6)                   | 42 (38.2)              | 35 (35.4)                  | 33 (31.1)              |
| Missing                                 | 2 (1.9)                     | 0 (0.0)                | 3 (2.9)                     | 9 (8.0)                | 6 (5.9)                     | 12 (10.9)              | 9 (9.1)                    | 16 (15.1)              |
| <b>Any dimension, n (%)</b>             |                             |                        |                             |                        |                             |                        |                            |                        |
| No problems                             | 8 (7.6)                     | 12 (10.3)              | 11 (10.5)                   | 12 (10.7)              | 12 (11.9)                   | 8 (7.3)                | 5 (5.1)                    | 9 (8.5)                |
| Moderate problems                       | 57 (53.8)                   | 55 (47.4)              | 64 (61.0)                   | 62 (55.4)              | 57 (56.4)                   | 58 (52.7)              | 59 (59.6)                  | 52 (49.1)              |
| Extreme problems                        | 39 (36.8)                   | 49 (42.2)              | 27 (25.7)                   | 30 (26.8)              | 26 (25.7)                   | 33 (30.0)              | 26 (26.3)                  | 30 (28.3)              |
| Reporting any problems <sup>a</sup>     | 96 (90.6)                   | 104 (89.7)             | 91 (86.7)                   | 92 (82.1)              | 83 (82.2)                   | 91 (82.7)              | 85 (85.9)                  | 82 (77.4)              |
| Missing                                 | 2 (1.9)                     | 0 (0.0)                | 3 (2.9)                     | 8 (7.1)                | 6 (5.9)                     | 11 (10.0)              | 9 (9.1)                    | 15 (14.2)              |
| <b>EQ-5D-3L index score<sup>b</sup></b> | 0.511                       | 0.491                  | 0.567                       | 0.529                  | 0.559                       | 0.451                  | 0.501                      | 0.436                  |
| <b>EQ-5D-3L VAS score<sup>b</sup></b>   | 60.29                       | 56.27                  | 61.86                       | 60.71                  | 64.08                       | 58.92                  | 62.87                      | 57.41                  |

<sup>a</sup>Reporting any problems is the sum of moderate problems and extreme problems.<sup>b</sup>Unadjusted

Abbreviations: EQ-VAS, EuroQol visual analogue scale

**Table S2** Problems in the EQ-5D dimensions, index scores and EQ-VAS in the long stayers (n=63)

|                                         | Discharge N=63             |                       | 1 month N=60               |                       | 6 months N=57              |                       | 12 months N=54             |                       |
|-----------------------------------------|----------------------------|-----------------------|----------------------------|-----------------------|----------------------------|-----------------------|----------------------------|-----------------------|
|                                         | Intervention group<br>n=42 | Control group<br>n=21 | Intervention group<br>n=40 | Control group<br>n=20 | Intervention group<br>n=38 | Control group<br>n=19 | Intervention group<br>n=35 | Control group<br>n=19 |
| <b>Mobility, n (%)</b>                  |                            |                       |                            |                       |                            |                       |                            |                       |
| No problems                             | 6 (14.3)                   | 1 (4.8)               | 7 (17.5)                   | 1 (5.0)               | 3 (7.9)                    | 2 (10.5)              | 4 (11.1)                   | 2 (10.5)              |
| Moderate problems                       | 33 (78.6)                  | 17 (81.0)             | 24 (60.0)                  | 16 (80.0)             | 23 (60.5)                  | 15 (79.0)             | 14 (38.9)                  | 12 (63.2)             |
| Extreme problems                        | 3 (7.1)                    | 3 (14.3)              | 2 (5.0)                    | 1 (5.0)               | 1 (2.6)                    | 0 (0.0)               | 4 (11.1)                   | 1 (5.3)               |
| Reporting any problems <sup>a</sup>     | 36 (85.7)                  | 20 (95.2)             | 26 (65.0)                  | 17 (85.0)             | 24 (63.2)                  | 15 (79.0)             | 18 (50.0)                  | 13 (68.4)             |
| Missing                                 | 0 (0.0)                    | 0 (0.0)               | 7 (17.5)                   | 2 (10.0)              | 11 (29.0)                  | 2 (10.5)              | 14 (38.9)                  | 4 (21.1)              |
| <b>Self-care, n (%)</b>                 |                            |                       |                            |                       |                            |                       |                            |                       |
| No problems                             | 24 (57.1)                  | 9 (42.9)              | 17 (42.5)                  | 11 (55.0)             | 17 (44.7)                  | 9 (47.4)              | 13 (36.1)                  | 9 (47.4)              |
| Moderate problems                       | 15 (35.7)                  | 6 (28.6)              | 14 (35.0)                  | 5 (25.0)              | 7 (18.4)                   | 7 (36.8)              | 5 (13.9)                   | 5 (26.3)              |
| Extreme problems                        | 3 (7.1)                    | 6 (28.6)              | 2 (5.0)                    | 2 (10.0)              | 3 (7.9)                    | 1 (5.3)               | 4 (11.1)                   | 1 (5.3)               |
| Reporting any problems <sup>a</sup>     | 18 (42.9)                  | 12 (57.1)             | 16 (40.0)                  | 7 (35.0)              | 10 (26.3)                  | 8 (42.1)              | 9 (25.0)                   | 6 (31.6)              |
| Missing                                 | 0 (0.0)                    | 0 (0.0)               | 7 (17.5)                   | 2 (10.0)              | 11 (29.0)                  | 2 (10.5)              | 14 (38.9)                  | 4 (21.1)              |
| <b>Usual activities, n (%)</b>          |                            |                       |                            |                       |                            |                       |                            |                       |
| No problems                             | 8 (19.1)                   | 3 (14.3)              | 6 (15.0)                   | 1 (5.0)               | 4 (10.5)                   | 2 (10.5)              | 4 (11.1)                   | 1 (5.3)               |
| Moderate problems                       | 22 (52.4)                  | 8 (38.1)              | 14 (35.0)                  | 8 (40.0)              | 15 (39.5)                  | 12 (63.2)             | 11 (30.6)                  | 11 (57.9)             |
| Extreme problems                        | 12 (28.6)                  | 10 (47.6)             | 13 (32.5)                  | 9 (45.0)              | 8 (21.1)                   | 3 (15.8)              | 7 (19.4)                   | 3 (15.8)              |
| Reporting any problems <sup>a</sup>     | 34 (81.0)                  | 18 (85.7)             | 27 (67.5)                  | 17 (85.0)             | 23 (60.5)                  | 15 (79.0)             | 18 (50.0)                  | 14 (73.7)             |
| Missing                                 | 0 (0.0)                    | 0 (0.0)               | 7 (17.5)                   | 2 (10.0)              | 11 (29.0)                  | 2 (10.5)              | 14 (38.9)                  | 4 (21.1)              |
| <b>Pain/discomfort, n (%)</b>           |                            |                       |                            |                       |                            |                       |                            |                       |
| No problems                             | 15 (35.7)                  | 10 (47.6)             | 9 (22.5)                   | 4 (20.0)              | 9 (23.7)                   | 4 (21.1)              | 6 (16.7)                   | 2 (10.5)              |
| Moderate problems                       | 22 (52.4)                  | 9 (42.9)              | 20 (50.0)                  | 11 (55.0)             | 13 (34.2)                  | 10 (52.6)             | 10 (27.8)                  | 10 (52.6)             |
| Extreme problems                        | 5 (11.9)                   | 2 (9.5)               | 4 (10.0)                   | 3 (15.0)              | 5 (13.2)                   | 2 (10.5)              | 6 (16.7)                   | 3 (15.8)              |
| Reporting any problems <sup>a</sup>     | 27 (64.3)                  | 11 (52.4)             | 24 (60.0)                  | 14 (70.0)             | 18 (47.4)                  | 12 (63.2)             | 16 (44.4)                  | 13 (68.4)             |
| Missing                                 | 0 (0.0)                    | 0 (0.0)               | 7 (17.5)                   | 2 (10.0)              | 11 (29.0)                  | 3 (15.8)              | 14 (38.9)                  | 4 (21.1)              |
| <b>Anxiety/depression, n (%)</b>        |                            |                       |                            |                       |                            |                       |                            |                       |
| No problems                             | 33 (78.6)                  | 8 (38.1)              | 23 (57.5)                  | 11 (55.0)             | 16 (42.1)                  | 8 (42.1)              | 15 (41.7)                  | 8 (42.1)              |
| Moderate problems                       | 7 (16.7)                   | 11 (52.4)             | 8 (20.0)                   | 5 (25.0)              | 9 (23.7)                   | 7 (36.8)              | 4 (11.1)                   | 7 (36.8)              |
| Extreme problems                        | 2 (4.8)                    | 2 (9.5)               | 2 (5.0)                    | 2 (10.0)              | 2 (5.3)                    | 1 (5.3)               | 3 (8.3)                    | 0 (0.0)               |
| Reporting any problems <sup>a</sup>     | 9 (21.4)                   | 13 (61.9)             | 10 (25.0)                  | 7 (35.0)              | 11 (29.0)                  | 8 (42.1)              | 7 (19.4)                   | 7 (36.8)              |
| Missing                                 | 0 (0.0)                    | 0 (0.0)               | 7 (17.5)                   | 2 (10.0)              | 11 (29.0)                  | 3 (15.8)              | 14 (38.9)                  | 4 (21.1)              |
| <b>Any dimension, n (%)</b>             |                            |                       |                            |                       |                            |                       |                            |                       |
| No problems                             | 3 (7.1)                    | 0 (0.0)               | 3 (7.5)                    | 0 (0.0)               | 3 (7.9)                    | 0 (0.0)               | 2 (5.6)                    | 0 (0.0)               |
| Moderate problems                       | 22 (52.4)                  | 9 (42.9)              | 14 (35.0)                  | 6 (30.0)              | 12 (31.6)                  | 12 (63.2)             | 9 (25.0)                   | 9 (47.4)              |
| Extreme problems                        | 17 (40.5)                  | 12 (57.1)             | 16 (40.0)                  | 12 (60.0)             | 12 (31.6)                  | 5 (26.3)              | 11 (30.6)                  | 6 (31.6)              |
| Reporting any problems <sup>a</sup>     | 39 (92.9)                  | 21 (100.0)            | 30 (75.0)                  | 18 (90.0)             | 24 (63.2)                  | 17 (89.5)             | 20 (55.6)                  | 15 (79.0)             |
| Missing                                 | 0 (0.0)                    | 0 (0.0)               | 7 (17.5)                   | 2 (10.0)              | 11 (29.0)                  | 2 (10.5)              | 14 (38.9)                  | 4 (21.1)              |
| <b>EQ-5D-3L index score<sup>b</sup></b> | 0.508                      | 0.366                 | 0.394                      | 0.330                 | 0.342                      | 0.459                 | 0.242                      | 0.362                 |
| <b>EQ-5D-3L VAS score<sup>b</sup></b>   | 56.15                      | 51.83                 | 52.85                      | 49.12                 | 52.72                      | 58.53                 | 52.97                      | 54.85                 |

<sup>a</sup>Reporting any problems is the sum of moderate problems and extreme problems.<sup>b</sup>Unadjusted

Abbreviations: EQ-VAS, EuroQol visual analogue scale

**Table S3** Results of multivariable multi-level logistic regression models of EQ-5D dimensions (no problem versus problem (moderate or extreme)) for the non-long stayers (n=222)

|                                          | Mobility                   |                  | Self-care                   |                  | Usual activities          |                  | Pain/Discomfort           |                  | Anxiety/Depression           |                  |
|------------------------------------------|----------------------------|------------------|-----------------------------|------------------|---------------------------|------------------|---------------------------|------------------|------------------------------|------------------|
|                                          | OR (95% CI)                | p-value          | OR (95% CI)                 | p-value          | OR (95% CI)               | p-value          | OR (95% CI)               | p-value          | OR (95% CI)                  | p-value          |
| Constant                                 | 0.32 (0.10 – 1.02)         | 0.055            | 0.11 (0.02 – 0.79)          | 0.029            | 0.00 (0.00 – 0.01)        | <0.001           | 0.55 (0.26 – 1.18)        | 0.127            | 0.08 (0.03 – 0.20)           | <0.001           |
| Intervention group                       | 0.61 (0.26 – 1.42)         | 0.253            | 1.10 (0.53 – 2.27)          | 0.793            | 0.70 (0.03 – 1.47)        | 0.352            | 1.12 (0.62 – 2.00)        | 0.707            | 0.93 (0.43 – 2.04)           | 0.860            |
| Time (reference: discharge)              |                            |                  |                             |                  |                           |                  |                           |                  |                              |                  |
| 1 month                                  | 0.81 (0.44 – 1.49)         | 0.499            | 0.72 (0.41 – 1.29)          | 0.271            | 0.75 (0.42 – 1.34)        | 0.331            | 0.78 (0.47 – 1.28)        | 0.328            | 0.77 (0.44 – 1.36)           | 0.369            |
| 6 months                                 | 1.18 (0.62 – 2.21)         | 0.616            | <b>0.31 (0.16 – 0.59)</b>   | <b>&lt;0.001</b> | 0.95 (0.52 – 1.73)        | 0.858            | 0.98 (0.59 – 1.62)        | 0.924            | 1.17 (0.66 – 2.07)           | 0.593            |
| 12 months                                | 2.14 (1.09 – 4.17)         | 0.026            | 0.72 (0.39 – 1.32)          | 0.286            | 0.99 (0.54 – 1.81)        | 0.965            | 1.40 (0.82 – 2.39)        | 0.219            | 0.98 (0.55 – 1.77)           | 0.957            |
| Study ward 1                             | <b>4.08 (1.54 – 10.76)</b> | <b>0.005</b>     | <b>2.49 (0.00 – 6.22)</b>   | <b>0.050</b>     | <b>2.57 (1.07 – 6.16)</b> | <b>0.035</b>     | NS                        | NS               | NS                           | NS               |
| Age when included <sup>a</sup>           | NS                         | NS               | NS                          | NS               | <b>1.10 (1.03 – 1.18)</b> | <b>0.004</b>     | NS                        | NS               | NA                           | NA               |
| Sex Female                               | NS                         | NS               | NA                          | NA               | NS                        | NS               | <b>2.54 (1.39 – 4.65)</b> | <b>0.002</b>     | <b>3.19 (1.41 – 7.21)</b>    | <b>0.005</b>     |
| Level of education >12 years             | NA                         | NA               | <b>2.26 (1.08 – 4.71)</b>   | <b>0.030</b>     | NA                        | NA               | NA                        | NA               | NA                           | NA               |
| Home-dwelling before included            | NS                         | NS               | <b>0.10 (0.02 – 0.53)</b>   | <b>0.006</b>     | NS                        | NS               | NA                        | NA               | NS                           | NS               |
| Living alone before included             | NS                         | NS               | NS                          | NS               | NS                        | NS               | NA                        | NA               | NA                           | NA               |
| Home-care services                       | <b>6.17 (2.37 – 16.09)</b> | <b>&lt;0.001</b> | <b>12.59 (5.26 – 30.14)</b> | <b>&lt;0.001</b> | <b>3.49 (1.52 – 8.04)</b> | <b>0.003</b>     | NS                        | NS               | NS                           | NS               |
| Number of medications total <sup>a</sup> | <b>1.17 (1.07 – 1.29)</b>  | <b>0.001</b>     | <b>1.09 (1.01 – 1.17)</b>   | <b>0.018</b>     | <b>1.26 (1.15 – 1.37)</b> | <b>&lt;0.001</b> | <b>1.12 (1.06 – 1.19)</b> | <b>&lt;0.001</b> | NS                           | NS               |
| Handling own medications                 | NS                         | NS               | NS                          | NS               | NS                        | NS               | NA                        | NA               | NS                           | NS               |
| Multidose adherence aid                  | NS                         | NS               | NS                          | NS               | NS                        | NS               | NA                        | NA               | <b>2.89 (1.18 – 7.06)</b>    | <b>0.020</b>     |
| Hypertension                             | NA                         | NA               | NA                          | NA               | NA                        | NA               | NS                        | NS               | NA                           | NA               |
| Asthma or COPD                           | NA                         | NA               | NS                          | NS               | NS                        | NS               | NS                        | NS               | NA                           | NA               |
| Atrial fibrillation                      | NS                         | NS               | NS                          | NS               | NS                        | NS               | NA                        | NA               | <b>2.50 (1.03 – 6.05)</b>    | <b>0.042</b>     |
| Diabetes                                 | NS                         | NS               | NS                          | NS               | NS                        | NS               | NA                        | NA               | <b>2.70 (1.00 – 7.25)</b>    | <b>0.049</b>     |
| Heart failure                            | NS                         | NS               | NS                          | NS               | NS                        | NS               | NA                        | NA               | NS                           | NS               |
| Renal failure                            | NA                         | NA               | NA                          | NA               | NA                        | NA               | NA                        | NA               | NS                           | NS               |
| Anxiety / depression                     | NA                         | NA               | NA                          | NA               | NA                        | NA               | NS                        | NS               | <b>28.27 (6.36 – 125.53)</b> | <b>&lt;0.001</b> |
| Dementia                                 | NA                         | NA               | NS                          | NS               | NA                        | NA               | <b>0.08 (0.01 – 0.49)</b> | <b>0.007</b>     | NA                           | NA               |
| Charlson Comorbidity Index <sup>b</sup>  | NS                         | NS               | NS                          | NS               | NS                        | NS               | NA                        | NA               | NA                           | NA               |

<sup>a</sup> Continuous variable

<sup>b</sup> Tested in a separate model from other comorbidities.

Abbreviations: COPD, Chronic Obstructive Pulmonary Disease; OR, odds ratio; CI, confidence interval; NS, not significant in multivariate regression; NA, not applicable based on univariate regression.

**Table S4** Results of multivariable multi-level logistic regression models of EQ-5D dimensions (no problem versus problem (moderate or extreme)) for the long stayers (n=63)

|                                          | Mobility                  |              | Self-care                 |              | Usual activities              |              | Pain/Discomfort           |              | Anxiety/Depression           |              |
|------------------------------------------|---------------------------|--------------|---------------------------|--------------|-------------------------------|--------------|---------------------------|--------------|------------------------------|--------------|
|                                          | OR (95% CI)               | p-value      | OR (95% CI)               | p-value      | OR (95% CI)                   | p-value      | OR (95% CI)               | p-value      | OR (95% CI)                  | p-value      |
| Constant                                 | 7.25 (0.74 – 70.56)       | 0.088        | 0.05 (0.01 – 0.35)        | 0.002        | 0.84 (0.09 – 8.26)            | 0.882        | 1.31 (0.37 – 4.67)        | 0.677        | 0.04 (0.00 – 0.35)           | 0.004        |
| Intervention group                       | 0.57 (0.11 – 2.99)        | 0.502        | 1.13 (0.33 – 3.89)        | 0.842        | 0.54 (0.10 – 2.97)            | 0.482        | 1.09 (0.46 – 2.61)        | 0.843        | 0.25 (0.05 – 1.19)           | 0.082        |
| Time (reference: discharge)              |                           |              |                           |              |                               |              |                           |              |                              |              |
| 1 month                                  | 0.55 (0.14 – 2.11)        | 0.382        | 0.95 (0.35 – 2.56)        | 0.914        | 1.54 (0.38 – 6.20)            | 0.544        | 2.23 (0.90 – 5.56)        | 0.085        | 0.89 (0.28 – 2.82)           | 0.843        |
| 6 months                                 | 0.97 (0.22 – 4.25)        | 0.963        | 0.70 (0.24 – 2.02)        | 0.511        | 1.57 (0.36 – 6.76)            | 0.548        | 1.82 (0.71 – 4.66)        | 0.213        | 2.39 (0.72 – 7.94)           | 0.155        |
| 12 months                                | 0.62 (0.14 – 2.67)        | 0.519        | 1.00 (0.32 – 3.08)        | 0.995        | 1.94 (0.40 – 9.41)            | 0.410        | 3.37 (1.13 – 10.00)       | 0.029        | 1.37 (0.39 – 4.82)           | 0.623        |
| Study ward Ward 1                        | NA                        |              | NS                        |              | <b>21.28 (2.30 – 196.75)</b>  | <b>0.007</b> | NA                        |              | NA                           |              |
| Age when included <sup>a</sup>           | NS                        |              | NS                        |              | NS                            |              | NS                        |              | NA                           |              |
| Sex Female                               | NA                        |              | NA                        |              | NA                            |              | NA                        |              | NS                           |              |
| Level of education >12 years             | NA                        |              | NS                        |              | NS                            |              | NA                        |              | NA                           |              |
| Home-dwelling before included            | NS                        |              | NA                        |              | NA                            |              | NA                        |              | NA                           |              |
| Living alone before included             | NA                        |              | NA                        |              | NS                            |              | NA                        |              | NA                           |              |
| Home-care services                       | NS                        |              | <b>6.5 (1.68 – 25.22)</b> | <b>0.007</b> | NS                            |              | NA                        |              | NS                           |              |
| Number of medications total <sup>a</sup> | <b>1.20 (1.01 – 1.42)</b> | <b>0.040</b> | <b>1.17 (1.03 – 1.34)</b> | <b>0.014</b> | NS                            |              | <b>1.11 (1.02 – 1.22)</b> | <b>0.015</b> | <b>1.32 (1.12 – 1.57)</b>    | <b>0.001</b> |
| Handling own medications                 | NA                        |              | NS                        |              | NS                            |              | NA                        |              | NS                           |              |
| Multidose adherence aid                  | NA                        |              | NS                        |              | NS                            |              | NA                        |              | NS                           |              |
| Hypertension                             | NA                        |              | NA                        |              | NS                            |              | <b>0.40 (0.17 – 0.91)</b> | <b>0.029</b> | NS                           |              |
| Asthma or COPD                           | NA                        |              | NA                        |              | <b>40.29 (1.42 – 1144.25)</b> | <b>0.030</b> | NS                        |              | NS                           |              |
| Atrial fibrillation                      | NA                        |              | NS                        |              | NA                            |              | <b>0.31 (0.12 – 0.78)</b> | <b>0.013</b> | NS                           |              |
| Diabetes                                 | NA                        |              | NA                        |              | NA                            |              | NA                        |              | NA                           |              |
| Heart failure                            | NA                        |              | NS                        |              | NA                            |              | NA                        |              | NA                           |              |
| Renal failure                            | NA                        |              | NS                        |              | NA                            |              | NA                        |              | NA                           |              |
| Anxiety / depression                     | NA                        |              | NA                        |              | NA                            |              | NS                        |              | <b>16.71 (1.40 – 199.84)</b> | <b>0.026</b> |
| Dementia                                 | NA                        |              | NA                        |              | NA                            |              | NA                        |              | NA                           |              |
| Charlson Comorbidity Index <sup>b</sup>  | NS                        |              | NS                        |              | NA                            |              | NA                        |              | NA                           |              |

<sup>a</sup> Continuous variable

<sup>b</sup> Tested separately from other comorbidities.

Abbreviations: COPD, Chronic Obstructive Pulmonary Disease; OR, odds ratio; CI, confidence interval; NS, not significant in multivariate regression; NA, not applicable based on univariate regression.

**Table S5** Results of univariable multi-level logistic regression models of EQ-5D dimensions (no problem versus problem (moderate or extreme)) for the full population (n=285)

|                                | Mobility                    |                  | Self-care                   |                  | Usual activities            |                  | Pain/Discomfort           |                  | Anxiety/Depression            |                  |
|--------------------------------|-----------------------------|------------------|-----------------------------|------------------|-----------------------------|------------------|---------------------------|------------------|-------------------------------|------------------|
|                                | OR (95% CI)                 | p-value          | OR (95% CI)                 | p-value          | OR (95% CI)                 | p-value          | OR (95% CI)               | p-value          | OR (95% CI)                   | p-value          |
| Constant                       | 16.41 (7.31 – 36.84)        | <0.001           | 0.36 (0.20 – 0.67)          | 0.001            | 10.02 (4.71 – 1.27)         | <0.001           | 2.31 (1.46 – 3.65)        | <0.001           | 0.48 (0.26 – 0.90)            | 0.022            |
| Intervention group             | 0.60 (0.27 – 1.35)          | 0.217            | 1.07 (0.52 – 2.20)          | 0.858            | 0.73 (0.33 – 1.62)          | 0.435            | 1.16 (0.69 – 1.97)        | 0.588            | 0.64 (0.30 – 1.37)            | 0.250            |
| Time (reference: discharge)    |                             |                  |                             |                  |                             |                  |                           |                  |                               |                  |
| 1 month                        | 0.69 (0.40 – 1.21)          | 0.199            | 0.73 (0.44 – 1.20)          | 0.215            | 0.74 (0.43 – 1.27)          | 0.274            | 0.99 (0.64 – 1.53)        | 0.968            | 0.80 (0.48 – 1.33)            | 0.392            |
| 6 months                       | 1.02 (0.57 – 1.83)          | 0.948            | 0.36 (0.21 – 0.62)          | <0.001           | 0.90 (0.51 – 1.58)          | 0.705            | 1.12 (0.72 – 1.76)        | 0.645            | 1.33 (0.79 – 2.22)            | 0.283            |
| 12 months                      | 1.57 (0.85 – 2.90)          | 0.148            | 0.71 (0.42 – 1.21)          | 0.213            | 0.94 (0.53 – 1.67)          | 0.839            | <b>1.68 (1.04 – 2.69)</b> | <b>0.034</b>     | 1.05 (0.62 – 1.78)            | 0.866            |
| Study ward Ward 1              | <b>9.08 (3.52 – 23.43)</b>  | <b>&lt;0.001</b> | <b>7.51 (3.00 – 18.81)</b>  | <b>&lt;0.001</b> | <b>11.33 (4.36 – 29.46)</b> | <b>&lt;0.001</b> | 0.91 (0.49 – 1.70)        | 0.772            | <b>3.11 (1.27 – 7.61)</b>     | <b>0.013</b>     |
| Age when included (continuous) | <b>1.17 (1.09 – 1.25)</b>   | <b>&lt;0.001</b> | <b>1.10 (1.03 – 1.16)</b>   | <b>0.003</b>     | <b>1.20 (81.12 – 1.29)</b>  | <b>&lt;0.001</b> | 0.99 (0.95 – 1.03)        | 0.752            | <b>0.96 (0.90 – 1.02)</b>     | <b>0.188</b>     |
| Sex Female                     | 1.47 (0.64 – 3.37)          | 0.367            | 0.91 (0.43 – 1.91)          | 0.806            | <b>2.03 (0.89 – 4.66)</b>   | <b>0.093</b>     | <b>2.34 (1.36 – 4.03)</b> | <b>0.002</b>     | <b>3.67 (1.68 – 8.03)</b>     | <b>0.001</b>     |
| Level of education >12 years   | 1.03 (0.45 – 2.35)          | 0.939            | 1.08 (0.52 – 2.25)          | 0.826            | <b>0.53 (0.23 – 1.21)</b>   | <b>0.132</b>     | 1.09 (0.63 – 1.86)        | 0.765            | 0.70 (0.33 – 1.52)            | 0.369            |
| Home-dwelling before included  | <b>0.05 (0.00 – 0.60)</b>   | <b>0.018</b>     | <b>0.20 (0.05 – 0.89)</b>   | <b>0.034</b>     | <b>0.02 (0.00 – 0.37)</b>   | <b>0.008</b>     | 0.69 (0.23 – 2.13)        | 0.523            | <b>2.50 (0.54 – 11.63)</b>    | <b>0.242</b>     |
| Living alone before included   | <b>2.77 (1.21 – 6.37)</b>   | <b>0.016</b>     | <b>2.30 (1.10 – 4.84)</b>   | <b>0.027</b>     | <b>4.83 (2.13 – 10.98)</b>  | <b>&lt;0.001</b> | 1.20 (0.79 – 0.69)        | 0.519            | 1.16 (0.54 – 2.49)            | 0.703            |
| Home-care services             | <b>13.10 (5.59 – 30.67)</b> | <b>&lt;0.001</b> | <b>17.44 (8.34 – 36.47)</b> | <b>&lt;0.001</b> | <b>16.62 (7.17 – 38.52)</b> | <b>&lt;0.001</b> | <b>1.62 (0.96 – 2.74)</b> | <b>0.071</b>     | <b>3.33 (1.54 – 7.17)</b>     | <b>0.002</b>     |
| Number of medications total    | <b>1.26 (1.15 – 1.38)</b>   | <b>&lt;0.001</b> | <b>1.21 (1.13 – 1.30)</b>   | <b>&lt;0.001</b> | <b>1.37 (1.25 – 1.51)</b>   | <b>&lt;0.001</b> | <b>1.13 (1.08 – 1.19)</b> | <b>&lt;0.001</b> | <b>1.17 (1.09 – 1.26)</b>     | <b>&lt;0.001</b> |
| Handling own medications       | <b>0.10 (0.043 – 0.24)</b>  | <b>&lt;0.001</b> | <b>0.08 (0.04 – 0.18)</b>   | <b>&lt;0.001</b> | <b>0.06 (0.03 – 0.14)</b>   | <b>&lt;0.001</b> | 1.05 (0.62 – 1.79)        | 0.854            | <b>0.21 (0.10 – 0.46)</b>     | <b>&lt;0.001</b> |
| Multidose adherence aid        | <b>6.62 (2.53 – 17.32)</b>  | <b>&lt;0.001</b> | <b>5.68 (2.57 – 12.54)</b>  | <b>&lt;0.001</b> | <b>12.19 (4.63 – 32.07)</b> | <b>&lt;0.001</b> | <b>1.46 (0.82 – 2.61)</b> | <b>0.201</b>     | <b>4.89 (2.12 – 11.31)</b>    | <b>&lt;0.001</b> |
| Hypertension                   | 0.96 (0.43 – 2.15)          | 0.916            | 0.98 (0.48 – 2.01)          | 0.959            | 1.42 (0.64 – 3.18)          | 0.390            | 1.20 (0.71 – 2.05)        | 0.489            | 0.67 (0.31 – 1.41)            | 0.289            |
| Asthma or COPD                 | 1.42 (0.58 – 3.49)          | 0.439            | <b>1.72 (0.78 – 3.81)</b>   | <b>0.178</b>     | <b>3.32 (1.33 – 8.25)</b>   | <b>0.010</b>     | <b>1.92 (1.06 – 3.46)</b> | <b>0.030</b>     | 1.20 (0.52 – 2.76)            | 0.670            |
| Atrial fibrillation            | <b>2.83 (1.01 – 7.23)</b>   | <b>0.030</b>     | <b>2.20 (0.98 – 4.91)</b>   | <b>0.055</b>     | <b>3.32 (1.32 – 8.32)</b>   | <b>0.011</b>     | 1.08 (0.59 – 1.95)        | 0.807            | <b>3.24 (1.38 – 7.58)</b>     | <b>0.007</b>     |
| Diabetes                       | <b>5.54 (1.82 – 16.89)</b>  | <b>0.003</b>     | <b>3.17 (1.30 – 7.78)</b>   | <b>0.011</b>     | <b>5.76 (1.94 – 17.06)</b>  | <b>0.002</b>     | 1.09 (0.56 – 2.10)        | 0.808            | <b>3.01 (1.14 – 7.93)</b>     | <b>0.026</b>     |
| Heart failure                  | <b>2.89 (0.88 – 9.47)</b>   | <b>0.079</b>     | <b>4.01 (1.47 – 10.94)</b>  | <b>0.007</b>     | <b>2.50 (0.79 – 7.90)</b>   | <b>0.117</b>     | 0.91 (0.43 – 1.91)        | 0.806            | <b>2.03 (0.76 – 6.37)</b>     | <b>0.144</b>     |
| Renal failure                  | 1.91 (0.61 – 6.07)          | 0.268            | 1.46 (0.54 – 3.93)          | 0.455            | 1.26 (0.41 – 3.84)          | 0.682            | 1.25 (0.60 – 2.61)        | 0.547            | 0.62 (0.22 – 1.76)            | 0.367            |
| Anxiety / depression           | 1.20 (0.30 – 4.78)          | 0.793            | <b>2.38 (0.70 – 8.15)</b>   | <b>0.167</b>     | <b>2.40 (0.58 – 9.83)</b>   | <b>0.225</b>     | <b>2.60 (1.00 – 6.71)</b> | <b>0.048</b>     | <b>43.18 (10.90 – 171.00)</b> | <b>&lt;0.001</b> |
| Dementia                       | 1.85 (0.19 – 18.47)         | 0.601            | <b>7.83 (1.09 – 56.22)</b>  | <b>0.041</b>     | 2.31 (0.23 – 22.68)         | 0.473            | <b>0.17 (0.04 – 0.72)</b> | <b>0.016</b>     | 0.36 (0.05 – 2.89)            | 0.339            |
| Charlson Comorbidity Index*    | <b>1.50 (1.18 – 1.91)</b>   | <b>&lt;0.001</b> | <b>1.46 (1.20 – 1.77)</b>   | <b>&lt;0.001</b> | <b>1.41 (1.12 – 1.79)</b>   | <b>0.004</b>     | 1.05 (0.92 – 1.21)        | 0.470            | 1.05 (0.86 – 1.29)            | 0.610            |

<sup>a</sup> Continuous variable

<sup>b</sup> Tested separately from other comorbidities.

Abbreviations: COPD, Chronic Obstructive Pulmonary Disease; OR, odds ratio; CI, confidence interval; NS, not significant in multivariate regression; NA, not applicable based on univariate regression.

**Table S6** Results of univariable multi-level logistic regression models of EQ-5D dimensions (no problem versus problem (moderate or extreme)) for the non-long stayers (n=222)

|                                | Mobility                           |                  | Self-care                          |                  | Usual activities                   |                  | Pain/Discomfort                    |                  | Anxiety/Depression                 |                  |
|--------------------------------|------------------------------------|------------------|------------------------------------|------------------|------------------------------------|------------------|------------------------------------|------------------|------------------------------------|------------------|
|                                | Univariable regression OR (95% CI) | p-value          | Univariable regression OR (95% CI) | p-value          | Univariable regression OR (95% CI) | p-value          | Univariable regression OR (95% CI) | p-value          | Univariable regression OR (95% CI) | p-value          |
| Constant                       | 12.59 (5.28 – 30.02)               | <0.001           | 0.29 (0.15 – 0.58)                 | 0.001            | 7.49 (3.44 – 16.29)                | <0.001           | 2.58 (1.51 – 4.40)                 | <0.001           | 0.44 (0.22 – 0.87)                 | 0.019            |
| Intervention group             | 0.50 (0.20 – 1.26)                 | 0.142            | 1.01 (0.44 – 2.31)                 | 0.99             | 0.60 (0.25 – 1.46)                 | 0.262            | 1.21 (0.64 – 2.29)                 | 0.548            | 0.92 (0.40 – 2.14)                 | 0.851            |
| Time (reference: discharge)    |                                    |                  |                                    |                  |                                    |                  |                                    |                  |                                    |                  |
| 1 month                        | 0.76 (0.41 – 1.40)                 | 0.374            | 0.69 (0.39 – 1.23)                 | 0.211            | 0.69 (0.38 – 1.24)                 | 0.213            | 0.78 (0.47 – 1.28)                 | 0.323            | 0.76 (0.43 – 1.34)                 | 0.349            |
| 6 months                       | 1.09 (0.58 – 2.05)                 | 0.794            | 0.30 (0.16 – 0.57)                 | <0.001           | 0.86 (0.47 – 1.58)                 | 0.629            | 0.97 (0.58 – 1.62)                 | 0.911            | 1.14 (0.65 – 2.03)                 | 0.636            |
| 12 months                      | 1.96 (1.00 – 3.85)                 | 0.049            | 0.67 (0.37 – 1.22)                 | 0.192            | 0.89 (0.48 – 1.65)                 | 0.715            | 1.39 (0.81 – 2.36)                 | 0.232            | 0.98 (0.54 – 1.75)                 | 0.935            |
| Study ward Ward 1              | <b>9.61 (3.35 – 27.60)</b>         | <b>&lt;0.001</b> | <b>6.15 (2.24 – 16.91)</b>         | <b>&lt;0.001</b> | <b>8.57 ( 3.13 – 23.47)</b>        | <b>&lt;0.001</b> | 1.01 (0.49 – 2.29)                 | 0.989            | <b>3.35 (1.27 – 8.82)</b>          | <b>0.014</b>     |
| Age when included (continuous) | <b>1.17 (1.08 – 1.27)</b>          | <b>&lt;0.001</b> | <b>1.07 (1.00 – 1.15)</b>          | <b>0.047</b>     | <b>1.21 ( 1.12 – 1.30)</b>         | <b>&lt;0.001</b> | 1.01 (0.95 – 1.06)                 | 0.813            | 0.97 (0.90 – 1.04)                 | 0.370            |
| Sex Female                     | <b>1.97 (0.76 – 5.06)</b>          | <b>0.161</b>     | 1.00 (0.42 – 2.35)                 | 0.994            | <b>2.04 (0.82 – 5.05)</b>          | <b>0.124</b>     | <b>2.60 (1.56 – 5.63)</b>          | <b>0.001</b>     | <b>4.18 (1.74 – 10.05)</b>         | <b>0.001</b>     |
| Level of education >12 years   | 1.03 (0.41 – 2.63)                 | 0.943            | <b>1.66 (0.72 – 3.82)</b>          | <b>0.237</b>     | 0.65 (0.26 – 1.60)                 | 0.346            | 0.94 (0.49 – 1.78)                 | 0.848            | 0.66 (0.28 – 1.56)                 | 0.342            |
| Home-dwelling before included  | <b>0.05 (0.00 – 1.07)</b>          | <b>0.056</b>     | <b>0.12 (0.02 – 0.88)</b>          | <b>0.038</b>     | <b>0.05 (0.00 – 0.74)</b>          | <b>0.030</b>     | 0.55 (0.11 – 2.69)                 | 0.458            | <b>0.29 (0.04 – 2.12)</b>          | <b>0.220</b>     |
| Living alone before included   | <b>4.00 (1.54 – 10.40)</b>         | <b>0.004</b>     | <b>2.26 (0.96 – 5.32)</b>          | <b>0.061</b>     | <b>4.96 (2.02 – 12.21)</b>         | <b>&lt;0.001</b> | 1.32 (0.69 – 2.52)                 | 0.398            | 0.82 (0.35 – 1.91)                 | 0.645            |
| Home-care services             | <b>16.69 (6.25 – 44.57)</b>        | <b>&lt;0.001</b> | <b>17.87 (7.65 – 41.72)</b>        | <b>&lt;0.001</b> | <b>16.12 (6.48 – 40.15)</b>        | <b>&lt;0.001</b> | <b>1.78 (0.95 – 3.34)</b>          | <b>0.072</b>     | <b>3.20 (1.36 – 7.55)</b>          | <b>0.008</b>     |
| Number of medications total    | <b>1.28 (1.15 – 1.40)</b>          | <b>&lt;0.001</b> | <b>1.20 (1.11 – 1.31)</b>          | <b>&lt;0.001</b> | <b>1.37 (1.24 – 1.52)</b>          | <b>&lt;0.001</b> | <b>1.15 (1.08 – 1.22)</b>          | <b>&lt;0.001</b> | <b>1.12 (1.03 – 1.22)</b>          | <b>0.006</b>     |
| Handling own medications       | <b>0.09 (0.03 – 0.23)</b>          | <b>&lt;0.001</b> | <b>0.08 (0.03 – 0.20)</b>          | <b>&lt;0.001</b> | <b>0.06 (0.02 – 0.15)</b>          | <b>&lt;0.001</b> | 1.01 (0.53 – 1.90)                 | 0.984            | <b>0.26 (0.11 – 0.62)</b>          | <b>0.002</b>     |
| Multidose adherence aid        | <b>9.49 (3.06 – 29.39)</b>         | <b>&lt;0.001</b> | <b>6.54 (2.57 – 16.67)</b>         | <b>&lt;0.001</b> | <b>13.40 (4.54 – 39.51)</b>        | <b>&lt;0.001</b> | 1.45 (0.72 – 2.95)                 | 0.301            | <b>5.774 (2.19 – 15.06)</b>        | <b>&lt;0.001</b> |
| Hypertension                   | 0.91 (0.36 – 2.25)                 | 0.830            | 0.88 (0.38 – 2.02)                 | 0.762            | 1.16 (0.48 – 2.80)                 | 0.739            | <b>1.63 (0.87 – 3.05)</b>          | <b>0.129</b>     | 0.89 (0.38 – 2.06)                 | 0.781            |
| Asthma or COPD                 | 1.50 (0.55 – 4.06)                 | 0.429            | <b>2.17 (0.88 – 5.34)</b>          | <b>0.093</b>     | <b>2.91 (1.10 – 7.75)</b>          | <b>0.032</b>     | <b>1.76 (0.88 – 3.52)</b>          | <b>0.108</b>     | 0.77 (0.31 – 1.93)                 | 0.578            |
| Atrial fibrillation            | <b>3.91 (1.34 – 11.41)</b>         | <b>0.013</b>     | <b>1.77 (0.70 – 4.47)</b>          | <b>0.228</b>     | <b>3.92 (1.43 – 10.77)</b>         | <b>&lt;0.001</b> | 1.52 (0.74 – 3.09)                 | 0.253            | <b>3.33 (1.29 – 8.61)</b>          | <b>0.013</b>     |
| Diabetes                       | <b>6.81 (1.92 – 24.10)</b>         | <b>0.003</b>     | <b>3.18 (1.13 – 8.93)</b>          | <b>0.029</b>     | <b>4.17 (1.31 – 13.25)</b>         | <b>0.016</b>     | 0.97 (0.44 – 2.14)                 | 0.949            | <b>3.50 (1.18 – 10.40)</b>         | <b>0.024</b>     |
| Heart failure                  | <b>3.25 (0.80 – 13.16)</b>         | <b>0.098</b>     | <b>3.75 (1.12 – 12.57)</b>         | <b>0.032</b>     | <b>2.65 (0.72 – 9.84)</b>          | <b>0.145</b>     | 0.90 (0.36 – 2.26)                 | 0.821            | <b>1.82 (0.53 – 6.29)</b>          | <b>0.343</b>     |
| Renal failure                  | 2.17 (0.55 – 8.61)                 | 0.269            | 0.82 (0.24 – 2.78)                 | 0.746            | 0.97 (0.27 – 3.50)                 | 0.959            | 1.01 (0.40 – 2.53)                 | 0.980            | <b>0.41 (0.12 – 1.41)</b>          | <b>0.157</b>     |
| Anxiety / depression           | 1.20 (0.25 – 5.79)                 | 0.817            | 2.28 (0.54 – 9.56)                 | 0.260            | 1.55 (0.33 – 7.25)                 | 0.580            | <b>2.34 (0.76 – 7.18)</b>          | <b>0.137</b>     | <b>45.38 (9.48 – 217.28)</b>       | <b>&lt;0.001</b> |
| Dementia                       | 0.75 (0.05 – 11.36)                | 0.834            | <b>9.43 (0.80 – 111.63)</b>        | <b>0.075</b>     | 0.86 (0.06 – 11.88)                | 0.913            | <b>0.07 (0.01 – 0.47)</b>          | <b>0.006</b>     | 0.10 (0.01 – 1.53)                 | 0.099            |
| Charlson Comorbidity Index*    | <b>1.48 (1.13 – 1.94)</b>          | <b>0.004</b>     | <b>1.42 (1.15 – 1.77)</b>          | <b>0.001</b>     | <b>1.40 (1.09 – 1.80)</b>          | <b>0.008</b>     | 1.05 (0.89 – 1.23)                 | 0.568            | 1.05 (0.85 – 1.31)                 | 0.642            |

\* Continuous variable

<sup>b</sup> Tested separately from other comorbidities.

Abbreviations: COPD, Chronic Obstructive Pulmonary Disease; OR, odds ratio; CI, confidence interval; NS, not significant in multivariate regression; NA, not applicable based on univariate regression.

**Table S7** Results of univariable multi-level logistic regression models of EQ-5D dimensions (no problem versus problem (moderate or extreme)) for the long stayers (n=63)

|                                | Mobility                   |              | Self-care                   |              | Usual activities              |              | Pain/Discomfort            |              | Anxiety/Depression           |              |
|--------------------------------|----------------------------|--------------|-----------------------------|--------------|-------------------------------|--------------|----------------------------|--------------|------------------------------|--------------|
|                                | Simple regression          |              | Simple regression           |              | Simple regression             |              | Simple regression          |              | Simple regression            |              |
|                                | OR (95% CI))               | p-value      | OR (95% CI))                | p-value      | OR (95% CI))                  | p-value      | OR (95% CI))               | p-value      | OR (95% CI))                 | p-value      |
| Constant                       | 52.50 (6.43 – 428.30)      | <0.001       | 0.99 (0.28 – 3.50)          | 0.992        | 40.04 (3.57 – 448.56)         | 0.003        | 1.79 (0.71 – 4.52)         | 0.217        | 0.91 (0.19 – 4.35)           | 0.906        |
| Intervention group             | 0.39 (0.07 – 2.28)         | 0.295        | 0.76 (0.19 – 3.12)          | 0.704        | 0.50 (0.07 – 3.87)            | 0.508        | 0.93 (0.35 – 2.51)         | 0.892        | 0.15 (0.02 – 1.06)           | 0.057        |
| Time (reference: discharge)    |                            |              |                             |              |                               |              |                            |              |                              |              |
| 1 month                        | 0.53 (0.14 – 2.07)         | 0.360        | 0.89 (0.33 – 2.41)          | 0.817        | 1.31 (0.32 – 5.56)            | 0.708        | 2.25 (0.89 – 5.69)         | 0.086        | 0.93 (0.29 – 2.95)           | 0.897        |
| 6 months                       | 0.92 (0.20 – 4.12)         | 0.911        | 0.66 (0.23 – 1.90)          | 0.438        | 1.38 (0.30 – 6.30)            | 0.681        | 1.75 (0.67 – 4.55)         | 0.250        | 2.35 (0.70 – 7.84)           | 0.166        |
| 12 months                      | 0.58 (0.13 – 2.57)         | 0.475        | 0.94 (0.31 – 2.90)          | 0.917        | 1.71 (0.33 – 8.76)            | 0.521        | 3.23 (1.08 – 9.69)         | 0.036        | 1.31 (0.37 – 4.62)           | 0.670        |
| Study ward Ward 1              | 2.78 (0.36 – 23.47)        | 0.326        | <b>9.83 (1.07 – 89.84)</b>  | <b>0.043</b> | <b>17.76 (1.72 – 183.44)</b>  | <b>0.016</b> | 0.44 (0.10 – 1.90)         | 0.273        | 2.33 (0.20 – 27.54)          | 0.503        |
| Age when included (continuous) | <b>1.11 (0.99 – 1.26)</b>  | <b>0.077</b> | <b>1.13 (1.01 – 1.26)</b>   | <b>0.032</b> | <b>1.10 (0.94 – 1.28)</b>     | <b>0.247</b> | <b>0.95 (0.87 – 1.02)</b>  | <b>0.167</b> | 0.92 (0.80 – 1.07)           | 0.279        |
| Sex Female                     | 0.47 (0.08 – 2.69)         | 0.393        | 0.84 (0.21 – 3.45)          | 0.810        | 2.73 (0.39 – 19.11)           | 0.311        | 1.08 (0.40 – 2.92)         | 0.882        | <b>3.01 (0.51 – 17.61)</b>   | <b>0.222</b> |
| Level of education >12 years   | 0.88 (0.18 – 4.29)         | 0.974        | <b>0.27 (0.06 – 1.14)</b>   | <b>0.074</b> | <b>0.16 (0.02 – 1.12)</b>     | <b>0.065</b> | 1.62 (0.62 – 4.28)         | 0.327        | 0.68 (0.11 – 4.03)           | 0.668        |
| Home-dwelling before included  | <b>0.15 (0.01 – 3.20)</b>  | <b>0.222</b> | 0.80 (0.11 – 5.78)          | 0.822        | 1 (omitted)                   |              | 1.05 (0.26 – 4.28)         | 0.941        | 0.63 (0.05 – 7.32)           | 0.710        |
| Living alone before included   | 0.42 (0.70 – 2.51)         | 0.340        | 2.00 (0.49 – 8.18)          | 0.332        | <b>3.02 (0.46 – 19.74)</b>    | <b>0.247</b> | 0.80 (0.30 – 2.14)         | 0.658        | 1.25 (0.22 – 7.27)           | 0.803        |
| Home-care services             | <b>2.57 (0.54 – 12.30)</b> | <b>0.236</b> | <b>11.22 (2.68 – 46.93)</b> | <b>0.001</b> | <b>8.62 (1.29 – 57.47)</b>    | <b>0.026</b> | 1.22 (0.46 – 3.21)         | 0.693        | <b>5.65 (0.88 – 36.09)</b>   | <b>0.067</b> |
| Number of medications total    | <b>1.20 (1.01 – 1.42)</b>  | <b>0.040</b> | <b>1.24 (1.08 – 1.42)</b>   | <b>0.002</b> | <b>1.33 (1.09 – 1.61)</b>     | <b>0.005</b> | <b>1.09 (1.00 – 1.20)</b>  | <b>0.062</b> | <b>1.37 (1.15 – 1.64)</b>    | <b>0.001</b> |
| Handling own medications       | 0.41 (0.08 – 2.08)         | 0.283        | <b>0.13 (0.03 – 0.50)</b>   | <b>0.003</b> | <b>0.16 (0.02 – 1.13)</b>     | <b>0.066</b> | 1.33 (0.49 – 3.58)         | 0.576        | <b>0.08 (0.01 – 0.054)</b>   | <b>0.009</b> |
| Multidose adherence aid        | 1.02 (0.20 – 5.27)         | 0.984        | <b>2.55 (0.63 – 10.30)</b>  | <b>0.188</b> | <b>4.02 (0.52 – 30.71)</b>    | <b>0.180</b> | 1.46 (0.55 – 3.92)         | 0.448        | <b>3.38 (0.60 – 19.20)</b>   | <b>0.169</b> |
| Hypertension                   | 1.10 (0.22 – 5.44)         | 0.907        | 1.29 (0.34 – 4.94)          | 0.710        | <b>3.53 (0.50 – 25.11)</b>    | <b>0.207</b> | <b>0.40 (0.16 – 0.99)</b>  | <b>0.048</b> | <b>0.21 (0.04 – 1.21)</b>    | <b>0.081</b> |
| Asthma or COPD                 | 2.06 (0.31 – 13.76)        | 0.455        | 1.04 (0.22 – 5.06)          | 0.958        | <b>32.15 (0.91 – 1138.49)</b> | <b>0.057</b> | <b>3.33 (1.07 – 10.40)</b> | <b>0.038</b> | <b>7.03 (0.98 – 50.45)</b>   | <b>0.052</b> |
| Atrial fibrillation            | 0.70 (0.12 – 3.91)         | 0.682        | <b>3.51 (0.77 – 15.97)</b>  | <b>0.104</b> | 1.22 (0.15 – 10.12)           | 0.850        | <b>0.30 (0.14 – 1.08)</b>  | <b>0.069</b> | <b>3.35 (0.47 – 23.66)</b>   | <b>0.226</b> |
| Diabetes                       | 2.26 (0.28 – 18.49)        | 0.448        | 2.53 (0.48 – 13.45)         | 0.275        | 1 (Empty)                     |              | 1.44 (0.44 – 4.72)         | 0.547        | 1.36 (0.17 – 11.01)          | 0.773        |
| Heart failure                  | 1.17 (0.16 – 8.42)         | 0.879        | <b>3.20 (0.60 – 17.00)</b>  | <b>0.172</b> | 0.98 (0.10 – 9.66)            | 0.984        | 0.93 (0.29 – 2.97)         | 0.898        | 5.22 (0.60 – 45.44)          | 0.134        |
| Renal failure                  | 0.67 (0.11 – 4.10)         | 0.666        | <b>2.81 (0.58 – 13.7)</b>   | <b>0.199</b> | 1.16 (0.12 – 11.01)           | 0.895        | 1.91 (0.60 – 6.12)         | 0.273        | 1.90 (0.25 – 14.17)          | 0.533        |
| Anxiety / depression           | 1.01 (0.08 – 12.77)        | 0.992        | 2.60 (0.27 – 24.04)         | 0.408        | 1 (Empty)                     |              | <b>3.77 (0.64 – 22.18)</b> | <b>0.142</b> | <b>45.18 (2.52 – 808.17)</b> | <b>0.010</b> |
| Dementia                       | 1 (Empty)                  |              | 4.63 (0.22 – 96.35)         | 0.322        | 1 (Empty)                     |              | 0.96 (0.11 – 8.20)         | 0.971        | 6.06 (0.13 – 287.44)         | 0.360        |
| Charlson Comorbidity Index*    | <b>1.40 (0.86 – 2.30)</b>  | <b>0.180</b> | <b>1.52 (0.97 – 2.36)</b>   | <b>0.065</b> | 1.27 (0.66 – 2.43)            | 0.470        | 1.09 (0.81 – 1.47)         | 0.576        | 0.99 (0.59 – 1.69)           | 0.984        |

<sup>a</sup> Continuous variable<sup>b</sup> Tested separately from other comorbidities.

Abbreviations: COPD, Chronic Obstructive Pulmonary Disease; OR, odds ratio; CI, confidence interval; NS, not significant in multivariate regression; NA, not applicable based on univariate regression.



**Table S8** Results of univariable and final multivariable mixed model regressions of index scores for the non-long stayers (n=222) and long stayers (n=63)

|                                          | Non-long stayers (n=222)     |                  |                              |                  | Long stayers (n=222)         |                  |                              |                  |
|------------------------------------------|------------------------------|------------------|------------------------------|------------------|------------------------------|------------------|------------------------------|------------------|
|                                          | Univariable regression       |                  | Multivariable regression     |                  | Univariable regression       |                  | Multivariable regression     |                  |
|                                          | $\beta$ (95% CI)             | p-value          | $\beta$ (95% CI)             | p-value          | $\beta$ (95% CI)             | p-value          | $\beta$ (95% CI)             | p-value          |
| Constant                                 | 0.47 (0.41 – 0.53)           | <0.001           | 0.54 (0.37 – 0.70)           | <0.001           | 0.46 (0.34 – 0.58)           | <0.001           | 0.76 (0.61 – 0.90)           | <0.001           |
| Intervention group                       | 0.06 (-0.02 – 0.13)          | 0.156            | 0.03 (-0.3 – 0.9)            | 0.363            | 0.003 (-0.12 – 0.13)         | 0.966            | -0.05 (-0.15 – 0.05)         | 0.310            |
| Time (reference: discharge)              |                              |                  |                              |                  |                              |                  |                              |                  |
| 1 month                                  | 0.05 (0.003 – 0.09)          | 0.037            | <b>0.05 (0.00 – 0.09)</b>    | <b>0.040</b>     | -0.09 (-0.19 – 0.1)          | 0.086            | -0.08 (-0.18 – 0.02)         | 0.310            |
| 6 months                                 | 0.002 (-0.04 – 0.05)         | 0.925            | 0.001 (-0.04 – 0.05)         | 0.954            | -0.08 (-0.118 – 0.02)        | 0.138            | -0.08 (-0.18 – 0.03)         | 0.140            |
| 12 months                                | -0.03 (-0.09 – -0.01)        | 0.146            | -0.03 (-0.08 – 0.01)         | 0.124            | -0.17 (-0.28 – -0.07)        | 0.001            | <b>-0.17 (-0.27 – -0.07)</b> | <b>0.001</b>     |
| Study ward 1                             | <b>-0.16 (-0.25 – 0.13)</b>  | <b>0.117</b>     |                              | NS               | <b>-0.11 (-0.29 – 0.06)</b>  | <b>0.206</b>     |                              | NS               |
| Age when included <sup>a</sup>           | <b>-0.01 (-0.02 – -0.01)</b> | <b>0.001</b>     |                              | NS               | -0.004 (-0.02 – 0.01)        | 0.362            |                              | NA               |
| Sex Female                               | <b>-0.05 (-0.13 – 0.03)</b>  | <b>0.225</b>     |                              | NS               | <b>-0.08 (-0.21 – 0.04)</b>  | <b>0.192</b>     |                              | NS               |
| Level of education >12 years             | -0.01 (-0.09 – 0.07)         | 0.800            |                              | NA               | <b>0.12 (0.00 – 0.24)</b>    | <b>0.049</b>     |                              | NS               |
| Home-dwelling before included            | <b>0.27 (-0.09 – 0.44)</b>   | <b>0.003</b>     | <b>0.23 (0.08 – 0.38)</b>    | <b>0.003</b>     | 0.05 (-0.13 – 0.23)          | 0.593            |                              | NA               |
| Living alone before included             | -0.03 (-0.11 – 0.05)         | 0.417            |                              | NA               | 0.01 (-0.11 – 0.14)          | 0.903            |                              | NA               |
| Home-care services                       | <b>-0.26 (-0.33 – -0.19)</b> | <b>&lt;0.001</b> | <b>-0.15 (-0.23 – -0.07)</b> | <b>&lt;0.001</b> | <b>-0.20 (-0.32 – -0.08)</b> | <b>0.001</b>     |                              | NS               |
| Number of medications total <sup>a</sup> | <b>-0.03 (-0.03 – -0.02)</b> | <b>&lt;0.001</b> | <b>-0.02 (-0.02 – -0.01)</b> | <b>&lt;0.001</b> | <b>-0.03 (-0.04 – -0.02)</b> | <b>&lt;0.001</b> | <b>-0.02 (-0.03 – -0.01)</b> | <b>&lt;0.001</b> |
| Handling own medications                 | <b>0.25 (0.18 – 0.32)</b>    | <b>&lt;0.001</b> |                              | NS               | <b>0.21 (0.09 – 0.32)</b>    | <b>&lt;0.001</b> |                              | NS               |
| Multidose adherence aid                  | <b>-0.26 (-0.34 – -0.18)</b> | <b>&lt;0.001</b> | <b>-0.10 (-0.19 – -0.02)</b> | <b>0.014</b>     | <b>-0.21 (-0.32 – -0.10)</b> | <b>&lt;0.001</b> | <b>-0.13 (-0.24 – -0.03)</b> | <b>0.011</b>     |
| Hypertension                             | -0.02 (-0.10 – 0.06)         | 0.596            |                              | NA               | 0.06 (-0.06 – 0.18)          | 0.300            |                              | NA               |
| Asthma or COPD                           | <b>-0.08 (-0.16 – 0.01)</b>  | <b>0.072</b>     |                              | NS               | <b>-0.17 (-0.30 – -0.03)</b> | <b>0.017</b>     |                              | NS               |
| Atrial fibrillation                      | -0.05 (-0.14 – 0.04)         | 0.276            |                              | NA               | 0.003 (-0.13 – 0.14)         | 0.965            |                              | NA               |
| Diabetes                                 | <b>-0.12 (-0.21 – -0.02)</b> | <b>0.017</b>     |                              | NS               | 0.02(-0.14 – 0.17)           | 0.826            |                              | NA               |
| Heart failure                            | <b>-0.08 (-0.20 – 0.03)</b>  | <b>0.148</b>     |                              | NS               | -0.04 (-0.19 – 0.11)         | 0.600            |                              | NA               |
| Renal failure                            | 0.02 (-0.10 – 0.13)          | 0.753            |                              | NA               | -0.06 (-0.20 – 0.08)         | 0.408            |                              | NA               |
| Anxiety / depression                     | <b>-0.14 (-0.28 – -0.01)</b> | <b>0.032</b>     |                              | NS               | <b>-0.16 (-0.35 – 0.04)</b>  | <b>0.117</b>     |                              | NS               |
| Dementia                                 | -0.11 (-0.33 – 0.11)         | 0.316            |                              | NA               | <b>-0.20 (-0.44 – 0.04)</b>  | <b>0.103</b>     |                              | NS               |
| Charlson Comorbidity Index <sup>b</sup>  | <b>-0.03 (-0.05 – -0.02)</b> | <b>0.001</b>     |                              | NS               | <b>-0.03 (-0.07 – 0.00)</b>  | <b>0.090</b>     |                              | NS               |

<sup>a</sup> Continuous variable

<sup>b</sup> Tested in a separate model from other comorbidities.

Abbreviations: COPD, Chronic Obstructive Pulmonary Disease; CI, confidence interval;  $\beta$ , regression coefficient; NS, not significant in multivariate regression; NA, not applicable based on univariate regression.

**Table S9** Results of univariable and final multivariable mixed model regressions of EQ-5D VAS for the non-long stayers (n=222) and long stayers (n=63)

|                                          | Non-long stayers (n=222)                    |                  |                                               | Long stayers (n=222) |                                             |              | Long stayers (n=63)                           |              |  |
|------------------------------------------|---------------------------------------------|------------------|-----------------------------------------------|----------------------|---------------------------------------------|--------------|-----------------------------------------------|--------------|--|
|                                          | Univariable regression coefficient (95% CI) | p-value          | Multivariable regression coefficient (95% CI) | p-value              | Univariable regression coefficient (95% CI) | p-value      | Multivariable regression coefficient (95% CI) | p-value      |  |
| Constant                                 | 56.37 (52.84 – 59.91)                       | <0.001           | 103.18 (76.06 – 130.30)                       | <0.001               | 53.67 (46.80 – <b>60.55</b> )               | <0.001       | 68.65 (59.41 – 77.89)                         | <0.001       |  |
| Intervention group                       | 3.82 (-0.74 – 8.39)                         | 0.101            | <b>4.02 (0.11 – 7.93)</b>                     | <b>0.044</b>         | 1.44 (-6.39 – 9.26)                         | 0.719        | 1.39 (-8.28 – 5.49)                           | 0.692        |  |
| Time (reference: discharge)              |                                             |                  |                                               |                      |                                             |              |                                               |              |  |
| 1 month                                  | 3.01 (0.24 – 5.77)                          | 0.033            | 2.56 (-0.21 – 5.33)                           | 0.070                | -3.02 (-9.25 – 3.19)                        | 0.340        | -3.70 (-9.89 – 2.50)                          | 0.242        |  |
| 6 months                                 | 3.18 (0.33 – 6.03)                          | 0.029            | 2.58 (-0.26 – 5.43)                           | 0.075                | -0.11 (-6.74 – 6.52)                        | 0.973        | -0.77 (-7.35 – 5.80)                          | 0.817        |  |
| 12 months                                | 1.87 (-1.12 – 4.86)                         | 0.219            | 1.07 (-1.93 – 4.06)                           | 0.485                | -1.02 (-8.27 – 6.22)                        | 0.782        | -1.51-8.69 – 5.68                             | 0.681        |  |
| Study ward 1                             | <b>-9.58 (-14.61 – -4.55)</b>               | <b>&lt;0.001</b> | <b>-7.19 (-11.85 – -2.54)</b>                 | <b>0.002</b>         | <b>-11.81 (-21.29 – -2.33)</b>              | <b>0.015</b> |                                               | NS           |  |
| Age when included <sup>a</sup>           | <b>-0.67 (-1.03 – -0.30)</b>                | <b>&lt;0.001</b> | <b>-0.38 (-0.72 – -0.03)</b>                  | <b>&lt;0.001</b>     | <b>-0.52 (-1.12 – 0.07)</b>                 | <b>0.084</b> |                                               | NS           |  |
| Sex Female                               | <b>-3.50 (-8.16 – 1.16)</b>                 | <b>0.141</b>     |                                               | NS                   | 1.63 (-6.13 – 9.39)                         | 0.680        |                                               | NA           |  |
| Level of education >12 years             | -0.97 (-5.65 – 3.70)                        | 0.684            |                                               | NA                   | <b>10.12 (2.88 – 17.38)</b>                 | <b>0.006</b> |                                               | NS           |  |
| Home-dwelling before included            | 6.13 (-6.23 – 18.48)                        | 0.331            |                                               | NA                   | 3.66 (-7.30 – 14.61)                        | 0.513        |                                               | NA           |  |
| Living alone before included             | <b>-3.44 (-8.04 – 1.16)</b>                 | <b>0.143</b>     |                                               | NS                   | -3.71 (-11.23 – 3.82)                       | 0.334        |                                               | NA           |  |
| Home-care services                       | <b>-9.78 (-14.19 – -5.37)</b>               | <b>&lt;0.001</b> |                                               | NS                   | <b>-11.66 (-18.61 – -4.72)</b>              | <b>0.001</b> | <b>-8.89 (-15.74 – -2.05)</b>                 | <b>0.011</b> |  |
| Number of medications total <sup>a</sup> | <b>-1.24 (-1.62 – -0.87)</b>                | <b>&lt;0.001</b> | <b>-1.16 (-1.52 – -0.81)</b>                  | <b>&lt;0.001</b>     | <b>-1.11 (-1.76 – -0.46)</b>                | <b>0.001</b> | <b>-0.85 (-1.50 – -0.21)</b>                  | <b>0.010</b> |  |
| Handling own medications                 | <b>8.14 (3.63 – 12.66)</b>                  | <b>&lt;0.001</b> |                                               | NS                   | <b>9.29 (1.94 – 16.65)</b>                  | <b>0.013</b> |                                               | NS           |  |
| Multidose adherence aid                  | <b>-10.62 (-15.60 – -5.65)</b>              | <b>&lt;0.001</b> |                                               | NS                   | <b>-10.90 (-18.49 – -3.31)</b>              | <b>0.005</b> |                                               | NS           |  |
| Hypertension                             | 0.81 (-3.77 – 5.38)                         | 0.730            |                                               | NA                   | 2.26 (-5.21 – 9.73)                         | 0.554        |                                               | NA           |  |
| Asthma or COPD                           | -1.75 (-6.69 – 3.18)                        | 0.486            |                                               | NA                   | <b>-6.66 (-14.68 – 1.36)</b>                | <b>0.104</b> |                                               | NS           |  |
| Atrial fibrillation                      | <b>-3.85 (-9.01 – 1.32)</b>                 | <b>0.144</b>     |                                               | NS                   | -3.38 (-12.40 – 5.64)                       | 0.463        |                                               | NA           |  |
| Diabetes                                 | <b>-5.24 (-10.78 – 0.29)</b>                | <b>0.063</b>     |                                               | NS                   | 1.83 (-7.72 – 11.38)                        | 0.707        |                                               | NA           |  |
| Heart failure                            | <b>-8.38 (-15.21 – -1.54)</b>               | <b>0.016</b>     |                                               | NS                   | -5.03 (-14.19 – 4.14)                       | 0.282        |                                               | NA           |  |
| Renal failure                            | -0.34 (-6.84 – 6.16)                        | 0.919            |                                               | NA                   | -1.88 (-10.79 – 7.04)                       | 0.680        |                                               | NA           |  |
| Anxiety / depression                     | <b>-5.68 (-13.89 – 2.53)</b>                | <b>0.175</b>     |                                               | NS                   | -3.69 (-16.01 – 8.63)                       | 0.557        |                                               | NA           |  |
| Dementia                                 | 0.51 (-15.13 – 16.14)                       | 0.949            |                                               | NA                   | -5.54 (-26.33 – 15.24)                      | 0.601        |                                               | NA           |  |
| Charlson Comorbidity Index <sup>b</sup>  | <b>-1.24 (-2.37 – -0.13)</b>                | <b>0.029</b>     |                                               | NS                   | -0.41 (-2.74 – 1.91)                        | 0.728        |                                               | NA           |  |

<sup>a</sup> Continuous variable

<sup>b</sup> Tested in a separate model from other comorbidities.

Abbreviations: COPD, Chronic Obstructive Pulmonary Disease; CI, confidence interval; β, regression coefficient; NS, not significant in multivariate regression; NA, not applicable based on univariate regression.
